# Supplementary material for: Early high antibody titre convalescent plasma for hospitalised COVID-19 patients: DAWn-plasma
Source: PubMed Central journal article supplement — Eur Respir J. 2022 Feb 10;59(2):2101724. doi: 10.1183/13993003.01724-2021 (PMC8576805; doi:10.1183/13993003.01724-2021), 2022-02-10
Supplement: ERJ-01724-2021.Shareable.pdf [file ERJ-01724-2021.Shareable.pdf]

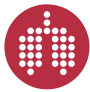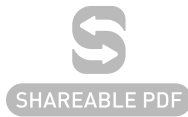

# Early high antibody titre convalescent plasma for hospitalised COVID-19 patients: DAWn-plasma

Timothy Devos<sup>1</sup>, Quentin Van Thillo<sup>2</sup>, Veerle Compennolle<sup>3,4</sup>, Tomé Najdovski<sup>5</sup>, Marta Romano<sup>6</sup>, Nicolas Dauby<sup>7</sup>, Laurent Jadot<sup>8</sup>, Mathias Leys<sup>9</sup>, Evelyne Maillart<sup>10</sup>, Sarah Loof<sup>11,12</sup>, Lucie Seyler<sup>13</sup>, Martial Moonen<sup>14</sup>, Michel Moutschen<sup>15</sup>, Niels Van Regenmortel<sup>16</sup>, Kevin K. Ariën<sup>17</sup>, Cyril Barbezange<sup>18</sup>, Albrecht Bettrains<sup>19</sup>, Mutien Garigliany<sup>20</sup>, Matthias M. Engelen<sup>21</sup>, Iwein Gyselinck<sup>22</sup>, Piet Maes<sup>23</sup>, Alexander Schauwvlieghe<sup>24</sup>, Laurens Liesenborghs<sup>25</sup>, Ann Belmans<sup>26,27</sup>, Peter Verhamme<sup>28</sup> and Geert Meyfroidt<sup>28</sup> for the DAWn-plasma investigators<sup>29</sup>

<sup>1</sup>Dept of Hematology, University Hospitals Leuven and Dept of Microbiology and Immunology, Laboratory of Molecular Immunology (Rega Institute), KU Leuven, Leuven, Belgium. <sup>2</sup>Center for Cancer Biology, Vlaams Instituut voor Biotechnologie (VIB) and Center for Human Genetics, KU Leuven, Leuven, Belgium. <sup>3</sup>Belgian Red Cross, Blood Services, Mechelen, Belgium. <sup>4</sup>Faculty of Medicine and Health Sciences, Ghent University, Ghent, Belgium. <sup>5</sup>Belgian Red Cross, Service du Sang, Namur, Belgium. <sup>6</sup>Immune Response Service, Infectious Diseases in Humans Scientific Directorate, Sciensano, Brussels, Belgium. <sup>7</sup>Dept of Infectious Diseases, CHU Saint-Pierre, School of Public Health, Institute for Medical Immunology, Université Libre de Bruxelles (ULB), Brussels, Belgium. <sup>8</sup>Dept of Anesthesiology and Intensive Care Medicine, and Dept of Infectious Diseases, CHC Mont Legia, Liege, Belgium. <sup>9</sup>Dept of Pulmonary Medicine, AZ Groeninge, Kortrijk, Belgium. <sup>10</sup>Dept of Infectious Diseases, Brugmann University Hospital, Brussels, Belgium. <sup>11</sup>Dept of Respiratory Medicine, AZ Maria Middelaers Gent, Ghent, Belgium. <sup>12</sup>Dept of Respiratory Medicine, AZ Sint-Vincentius Deinze, Deinze, Belgium. <sup>13</sup>Dept of Infectious Diseases and Internal Medicine, UZ Brussel Hospital, Brussels, Belgium. <sup>14</sup>Dept of Internal Medicine and Infectious Diseases, Centre Hospitalier Regional (CHR), Liege, Belgium. <sup>15</sup>Infectious Diseases and General Internal Medicine, CHU de Liege, Liege, Belgium. <sup>16</sup>Dept of Intensive Care Medicine, Ziekenhuis Netwerk Antwerpen Campus Stuivenberg, Antwerp, Belgium. <sup>17</sup>Virology Unit, Institute of Tropical Medicine Antwerp, Dept of Biomedical Sciences, University of Antwerp, Antwerp, Belgium. <sup>18</sup>National Influenza Centre, Sciensano, Brussels, Belgium. <sup>19</sup>Dept of General Internal Medicine, University Hospitals Leuven, Dept of Microbiology, Immunology and Transplantation, KU Leuven, Leuven, Belgium. <sup>20</sup>Faculty of Veterinary Medicine, Animal Pathology, University of Liege, Liege, Belgium. <sup>21</sup>Dept of Cardiovascular Sciences, UZ and KU Leuven, Leuven, Belgium. <sup>22</sup>Laboratory of Respiratory Diseases and Thoracic Surgery (BREATHE), Dept CHROMETA, Respiratory Diseases UZ Leuven, Leuven, Belgium. <sup>23</sup>Clinical and Epidemiological Virology, Rega Institute for Medical Research, KU Leuven, Leuven, Belgium. <sup>24</sup>Dept of Haematology, Ghent University Hospital, Ghent, Belgium. <sup>25</sup>Laboratory of Virology and Chemotherapy, Dept of Microbiology, Immunology and Transplantation, Rega Institute for Medical Research, KU Leuven, Leuven, Belgium. <sup>26</sup>I-BioStat, KU Leuven, Leuven, Belgium. <sup>27</sup>University Hasselt, Hasselt, Belgium. <sup>28</sup>Dept of Intensive Care Medicine, University Hospitals Leuven, Dept of Cellular and Molecular Medicine, Laboratory of Intensive Care Medicine, KU Leuven, Leuven, Belgium. <sup>29</sup>A list of the DAWn-plasma investigators can be found in the Acknowledgements section.

Corresponding author: Geert Meyfroidt ([geert.meyfroidt@uzleuven.be](mailto:geert.meyfroidt@uzleuven.be))

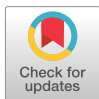

Shareable abstract (@ERSpublications)

Early transfusion of 4 units of high neutralising antibody titre convalescent plasma in hospitalised COVID-19 patients does not reduce mortality or the need for mechanical ventilation <https://bit.ly/3fiRY2I>

**Cite this article as:** Devos T, Van Thillo Q, Compennolle V, *et al.* Early high antibody titre convalescent plasma for hospitalised COVID-19 patients: DAWn-plasma. *Eur Respir J* 2022; 59: 2101724 [DOI: 10.1183/13993003.01724-2021].

This single-page version can be shared freely online.

## Abstract

**Background** Several randomised clinical trials have studied convalescent plasma for coronavirus disease 2019 (COVID-19) using different protocols, with different severe acute respiratory syndrome coronavirus 2 (SARS-CoV-2) neutralising antibody titres, at different time-points and severities of illness.

**Methods** In the prospective multicentre DAWn-plasma trial, adult patients hospitalised with COVID-19 were randomised to 4 units of open-label convalescent plasma combined with standard of care (intervention group) or standard of care alone (control group). Plasma from donors with neutralising antibody titres (50% neutralisation titre (NT<sub>50</sub>))  $\geq 1/320$  was the product of choice for the study.

Copyright ©The authors 2022.

This version is distributed under the terms of the Creative Commons Attribution Non-Commercial Licence 4.0. For commercial reproduction rights and permissions contact [permissions@ersnet.org](mailto:permissions@ersnet.org)

This article has an editorial commentary:

<https://doi.org/10.1183/13993003.02076-2021>

Received: 17 June 2021

Accepted: 24 July 2021

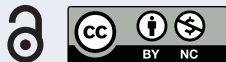

**Results** Between 2 May 2020 and 26 January 2021, 320 patients were randomised to convalescent plasma and 163 patients to the control group according to a 2:1 allocation scheme. A median (interquartile range) volume of 884 (806–906) mL convalescent plasma was administered and 80.68% of the units came from donors with neutralising antibody titres ( $NT_{50} \geq 1/320$ ). Median time from onset of symptoms to randomisation was 7 days. The proportion of patients alive and free of mechanical ventilation on day 15 was not different between both groups (convalescent plasma 83.74% (n=267) versus control 84.05% (n=137)) (OR 0.99, 95% CI 0.59–1.66; p=0.9772). The intervention did not change the natural course of antibody titres. The number of serious or severe adverse events was similar in both study arms and transfusion-related side-effects were reported in 19 out of 320 patients in the intervention group (5.94%).

**Conclusions** Transfusion of 4 units of convalescent plasma with high neutralising antibody titres early in hospitalised COVID-19 patients did not result in a significant improvement of clinical status or reduced mortality.
