# Supplementary material for: Early high antibody titre convalescent plasma for hospitalised COVID-19 patients: DAWn-plasma
Source: PubMed Central journal article supplement — Eur Respir J. 2022 Feb 10;59(2):2101724. doi: 10.1183/13993003.01724-2021 (PMC8576805; doi:10.1183/13993003.01724-2021), 2022-02-10
Supplement: ERJ-01724-2021.Supplement_S1.pdf [file ERJ-01724-2021.Supplement_S1.pdf]

## Supplement S1: Supplementary Appendix

### Author contributions:

Drs Devos and Meyfroidt had full access to all of the data in the study and take responsibility for the integrity of the data and the accuracy of the data analysis.

*Concept and design:* Devos, Liesenborghs, Meyfroidt, Schauwvlieghe, Verhamme.

*Acquisition, analysis, or interpretation of data:* Belmans, Devos, Meyfroidt, Romano, Dauby.

*Drafting of the manuscript:* Devos, Compernelle, Najdovski, Romano, Dauby, Belmans, Verhamme, Meyfroidt.

*Critical revision of the manuscript for important intellectual content:* all authors.

*Writing and remodeling of the manuscript:* Devos, Van Thillo, Meyfroidt.

*Statistical analysis:* Belmans.

*Administrative, technical, or material support:* Compernelle, Najdovski, Romano, Devos, Meyfroidt.

*Supervision:* Meyfroidt, Devos.

*Other - site PI for study; recruitment and management of study participants; participation in investigator meetings:* Jadot, Leys, Maillart, Loof, Seyler, Moonen, Moutschen, Van Regenmortel, Dauby, Devos.

*Other - responsible for recruitment of patients at my institution:* Van Thillo, Betrains, Engelen, Gyselinck.

*Other - laboratory directors (VNA testing):* Ariën, Barbezange, Gargigliany, Maes.

### **DAWN-plasma investigators**

In addition to the individual authors, the following DAWN-plasma Investigators (listed in alphabetical order) participated in the study and are considered as co-authors (full authorship and pubmed-citation requested):

Georgala Aspasia

Nina Bijmens

Kris Bogaerts

Bernard Bouckaert

Helga Ceunen

Myriam Cleeren

Jan Cools

Kristof Cuppens

Barbara Debaveye

Mélanie Delvallée

Paul De Munter

Daniel Desmecht

Elke Govaerts

David Grimaldi

Wim Janssens

Johan Neyts

Jill Pannecoucke

Elisabeth Porcher

Camélia Rossi

Thomas Van Assche

Katleen Vandenberghe

Emmanuel Van der Hauwaert

Steven Vanderschueren

Eric Van Wijngaerden

Geert Verbeke

Clothilde Visée

Robin Vos

Jean Cyr Yombi
