# Supplementary material for: Early high antibody titre convalescent plasma for hospitalised COVID-19 patients: DAWn-plasma
Source: PubMed Central journal article supplement — Eur Respir J. 2022 Feb 10;59(2):2101724. doi: 10.1183/13993003.01724-2021 (PMC8576805; doi:10.1183/13993003.01724-2021), 2022-02-10
Supplement: ERJ-01724-2021.Supplement_S3.pdf [file ERJ-01724-2021.Supplement_S3.pdf]

### Supplement S3: Supplementary Table: Concomitant Therapy – Full Analysis Set (FAS)

| Concomitant Therapy                  | Randomised Treatment |                  |                  | P-value |
|--------------------------------------|----------------------|------------------|------------------|---------|
|                                      | PLASMA + SOC         | SOC              | Total            |         |
| Total Number of Patients             | 320                  | 163              | 483              |         |
| Specific Treatment for Covid-19 Used | 130/320 ( 40.6%)     | 74/163 ( 45.4%)  | 204/483 ( 42.2%) | 0.331   |
| Chloroquine                          | 0/320 ( 0.0%)        | 0/163 ( 0.0%)    | 0/483 ( 0.0%)    |         |
| Hydroxychloroquine                   | 4/320 ( 1.3%)        | 3/163 ( 1.8%)    | 7/483 ( 1.4%)    | 0.693   |
| Favipiravir                          | 0/320 ( 0.0%)        | 0/163 ( 0.0%)    | 0/483 ( 0.0%)    |         |
| Remdesivir                           | 46/319 ( 14.4%)      | 25/160 ( 15.6%)  | 71/479 ( 14.8%)  | 0.785   |
| Tocilizumab                          | 1/320 ( 0.3%)        | 2/163 ( 1.2%)    | 3/483 ( 0.6%)    | 0.264   |
| Lopinavir/Ritonavir                  | 1/320 ( 0.3%)        | 1/163 ( 0.6%)    | 2/483 ( 0.4%)    | 1.000   |
| Other                                | 78/320 ( 24.4%)      | 46/163 ( 28.2%)  | 124/483 ( 25.7%) | 0.379   |
| Other Antiviral Drugs                | 18/320 ( 5.6%)       | 8/163 ( 4.9%)    | 26/483 ( 5.4%)   | 0.833   |
| Antibiotics                          | 174/320 ( 54.4%)     | 94/163 ( 57.7%)  | 268/483 ( 55.5%) | 0.500   |
| Antifungal Treatment                 | 30/320 ( 9.4%)       | 15/163 ( 9.2%)   | 45/483 ( 9.3%)   | 1.000   |
| Systemic Corticosteroids             | 208/320 ( 65.0%)     | 112/162 ( 69.1%) | 320/482 ( 66.4%) | 0.414   |
| Hydrocortisone                       | 0/320 ( 0.0%)        | 1/162 ( 0.6%)    | 1/482 ( 0.2%)    | 0.336   |
| Methylprednisolone                   | 35/320 ( 10.9%)      | 25/162 ( 15.4%)  | 60/482 ( 12.5%)  | 0.188   |
| Prednisolone                         | 3/320 ( 0.9%)        | 0/162 ( 0.0%)    | 3/482 ( 0.6%)    | 0.554   |
| Dexamethasone                        | 179/320 ( 55.9%)     | 88/162 ( 54.3%)  | 267/482 ( 55.4%) | 0.771   |
| Other                                | 1/320 ( 0.3%)        | 2/162 ( 1.2%)    | 3/482 ( 0.6%)    | 0.262   |
| Anticoagulation                      | 306/319 ( 95.9%)     | 153/160 ( 95.6%) | 459/479 ( 95.8%) | 1.000   |

Results are presented as n/N (%) whereby N=total number of patients with data available, n=number of patients with medication during hospital stay up to Day 30 and %=n\*100/N. Differences between randomised groups were assessed using Fisher's exact test.
