# Supplementary material for: Early high antibody titre convalescent plasma for hospitalised COVID-19 patients: DAWn-plasma
Source: PubMed Central journal article supplement — Eur Respir J. 2022 Feb 10;59(2):2101724. doi: 10.1183/13993003.01724-2021 (PMC8576805; doi:10.1183/13993003.01724-2021), 2022-02-10
Supplement: ERJ-01724-2021.Supplement_S4.pdf [file ERJ-01724-2021.Supplement_S4.pdf]

Supplement S4: Supplementary table: Trial Primary and Secondary Endpoints – Per Protocol Set (PPS)

| Per Protocol Set                                  |            |                                    |                    |                  |                      |
|---------------------------------------------------|------------|------------------------------------|--------------------|------------------|----------------------|
| Primary and secondary endpoints                   | Statistic  | Estimate (95% Confidence Interval) |                    | Treatment Effect | Estimate (95% CI)    |
|                                                   |            | Plasma                             | SOC                |                  |                      |
| Alive and free of MV at 15 Days                   | %          | 85.0 (80.5; 88.7)                  | 84.5 (78.0; 89.3)  |                  | 1.05 ( 0.59; 1.86)   |
| Alive and free of MV at 30 Days                   | KM [%]     | 83.7 (79.2; 87.6)                  | 82.6 (76.4; 88.0)  |                  | 0.900 (0.56; 1.44)   |
| Sustained Improvement or Discharge within 30 Days | CIF [%]    | 83.0 ( 78.2; 86.9)                 | 85.7 ( 79.2; 90.3) |                  | 0.970 (0.796; 1.182) |
| Hospital Discharge (30 Days)                      | CIF [%]    | 81.2 ( 76.3; 85.2)                 | 80.8 ( 73.8; 86.1) |                  | 1.050 (0.855; 1.291) |
| All-Cause Mortality                               |            |                                    |                    |                  |                      |
| Day 15                                            | KM [%]     | 3.4 ( 1.9; 6.2)                    | 5.0 ( 2.5; 9.7)    |                  | 0.638 (0.251; 1.620) |
| Day 30                                            | KM [%]     | 9.1 ( 6.3; 13.1)                   | 8.2 ( 4.8; 13.7)   |                  | 1.070 (0.545; 2.102) |
| Supplemental Oxygen (30 Days)                     |            |                                    |                    |                  |                      |
| Incidence                                         | CIF [%]    | 89.6 ( 85.4; 92.6)                 | 88.8 ( 82.8; 92.8) |                  | 1.011 (0.935; 1.094) |
| Life-Weaning from SO <sub>2</sub>                 | CIF [%]    | 82.0 ( 76.7; 86.1)                 | 82.7 ( 75.3; 88.1) |                  | 1.068 (0.867; 1.316) |
| Mechanical Ventilation (30 Days)                  |            |                                    |                    |                  |                      |
| Incidence                                         | CIF [%]    | 13.6 ( 10.0; 17.8)                 | 13.0 ( 8.4; 18.8)  |                  | 1.030 (0.600; 1.766) |
| Life-Weaning from MV                              | CIF [%]    | 54.9 (37.5; 69.3)                  | 71.4 ( 45.8; 86.5) |                  | 0.363 (0.149; 0.885) |
| ICU (30 Days)                                     |            |                                    |                    |                  |                      |
| Admission                                         | CIF [%]    | 34.7 ( 29.3; 40.1)                 | 33.6 ( 26.4; 40.9) |                  | 0.992 (0.728; 1.353) |
| Life Discharge                                    | CIF [%]    | 77.5 ( 68.0; 84.4)                 | 83.3 ( 70.0; 91.1) |                  | 0.937 (0.649; 1.354) |
| Clinical Status                                   |            |                                    |                    |                  |                      |
| Day 0                                             | Med. (IQR) | 5 (5; 5)                           | 5 (5; 5)           |                  |                      |
| Day 15                                            | Med. (IQR) | 2 (0; 5)                           | 2 (0; 5)           |                  | 1.12 ( 0.80; 1.58)   |
| Day 30                                            | Med. (IQR) | 2 (0; 2)                           | 2 (0; 3)           |                  | 0.97 ( 0.68; 1.38)   |
| NT50 Values                                       |            |                                    |                    |                  |                      |
| Day 0 - Log <sub>2</sub> -transformed             | Med. (IQR) | 3 (1; 5)                           | 3 (1; 5)           |                  |                      |
| Day 6 - Log <sub>2</sub> -transformed             | Med. (IQR) | 6 (5; 6)                           | 6 (5; 6)           |                  | -0.14 (-0.65; 0.37)  |
| Ratio (D6/D0) - Log <sub>2</sub> -transf'd        | Med. (IQR) | 2 (1; 3)                           | 2 (0; 4)           |                  | -0.20 (-0.86; 0.45)  |
|                                                   |            |                                    |                    |                  |                      |

KM = incidence estimated using Kaplan-Meier methodology; 95% confidence interval calculated using log(-log)-transformation. CIF = incidence estimated using Cumulative Incidence Function accounting for competing risk; SD = standard deviation; Med. = Median; IQR = Interquartile range; HR = hazard ratio; OR = odds ratio.

All estimates of treatment effects were adjusted for study site and period.

Hazard ratios were obtained using a Cox regression including factors for randomised treatment, study period and site. Subdistribution hazard ratios were obtained using a Fine&Grey regression model (accounting for competing risk) including factors for randomised treatment, study period and site. Mean differences between treatments were obtained using a general linear model including the baseline value as a covariate and factors for randomised treatment, study period and site. Common odds ratios were obtained using a proportional odds logistic regression analysis including baseline clinical status as covariate and factors for randomised treatment, study period and site.
