# Supplementary material for: Early high antibody titre convalescent plasma for hospitalised COVID-19 patients: DAWn-plasma
Source: PubMed Central journal article supplement — Eur Respir J. 2022 Feb 10;59(2):2101724. doi: 10.1183/13993003.01724-2021 (PMC8576805; doi:10.1183/13993003.01724-2021), 2022-02-10
Supplement: ERJ-01724-2021.Supplement_S5.pdf [file ERJ-01724-2021.Supplement_S5.pdf]

### Supplement S5A: Interaction between treatment and baseline FiO<sub>2</sub>

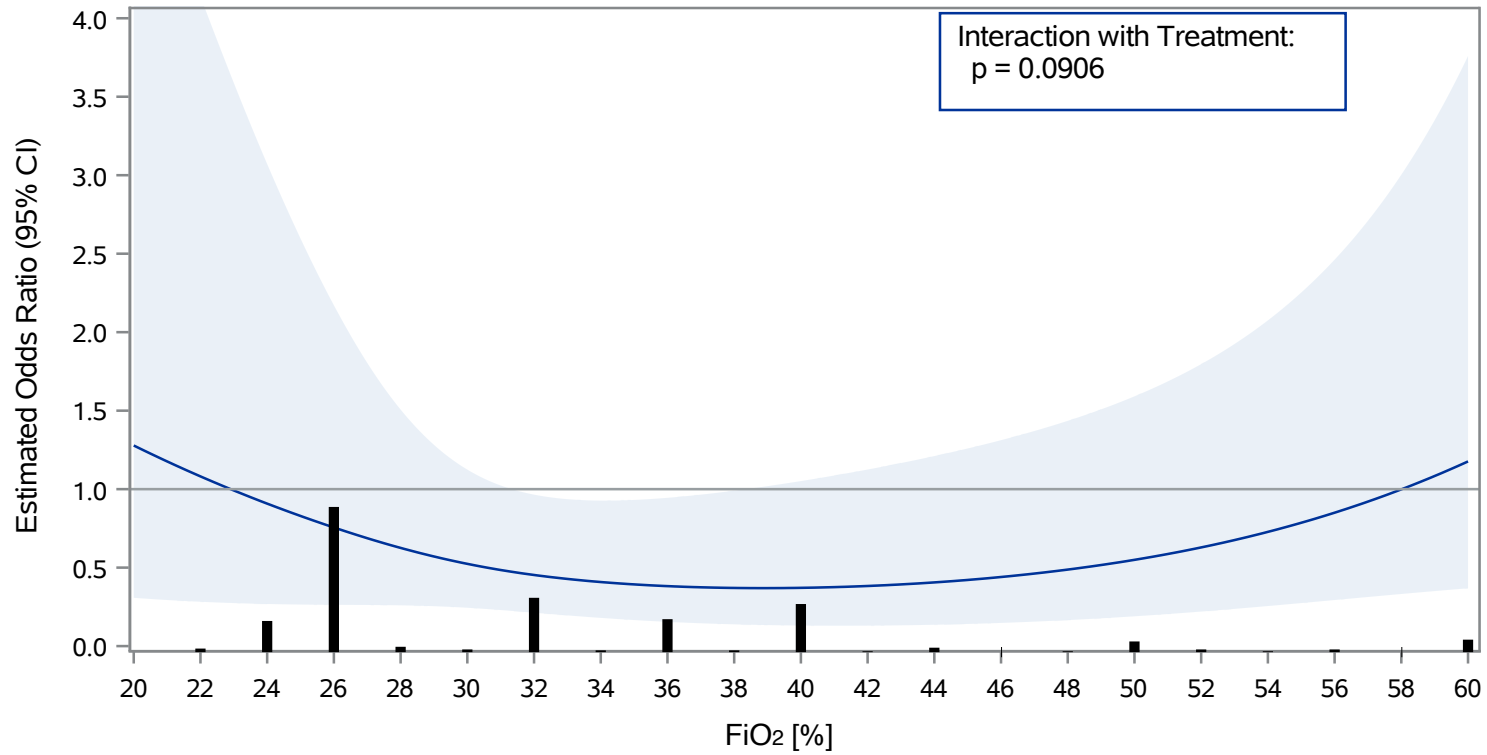

Odds ratios were obtained from a logistic regression model, including treatment (as factor), FiO<sub>2</sub> (as restricted cubic spline) and their interaction, and further adjusted for Study Site and Period. A histogram for the distribution of patients across the covariate values is included at the bottom of the graph.

### Supplement S5B: Interaction between treatment and time from symptoms to randomisation

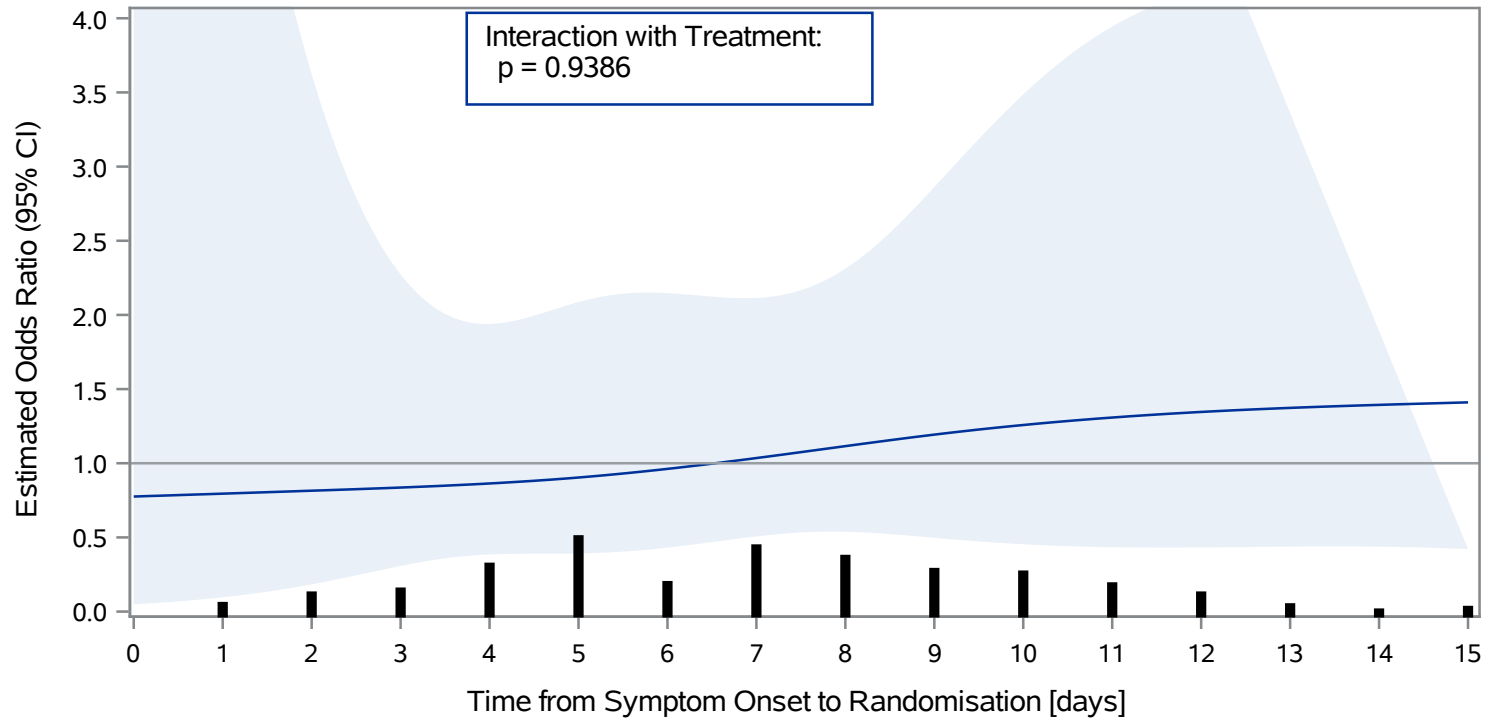

Odds ratios were obtained from a logistic regression model, including treatment (as factor), Time from Symptom Onset to Randomisation (as restricted cubic spline) and their interaction, and further adjusted for Study Site and Period.

A histogram for the distribution of patients across the covariate values is included at the bottom of the graph.
