# Supplementary material for: Early high antibody titre convalescent plasma for hospitalised COVID-19 patients: DAWn-plasma
Source: PubMed Central journal article supplement — Eur Respir J. 2022 Feb 10;59(2):2101724. doi: 10.1183/13993003.01724-2021 (PMC8576805; doi:10.1183/13993003.01724-2021), 2022-02-10
Supplement: ERJ-01724-2021.Supplement_S6.pdf [file ERJ-01724-2021.Supplement_S6.pdf]

Supplement S6: Supplementary Table: Venous Thromboembolisms and Serious Adverse Events – Full Analysis Set (FAS)

| Adverse Events up to End of Study:<br>SYSTEM ORGAN CLASS<br>Preferred Term    | Randomised Treatment |             |
|-------------------------------------------------------------------------------|----------------------|-------------|
|                                                                               | PLASMA + SOC         | SOC         |
| Total Number of Subjects                                                      | 320                  | 163         |
| <b>DEEP VEIN THROMBOEMBOLISMS</b>                                             |                      |             |
| Any Venous Thromboembolisms                                                   | 1 ( 0.3%)            | 1 ( 0.6%)   |
| Deep Vein Thrombosis                                                          | 0 ( 0.0%)            | 0 ( 0.0%)   |
| Pulmonary Embolism                                                            | 1 ( 0.3%)            | 1 ( 0.6%)   |
| <b>SERIOUS ADVERSE EVENTS BY MEDDRA SYSTEM ORGAN CLASS AND PREFERRED TERM</b> |                      |             |
| Number of subjects with Serious Adverse Events                                | 66 ( 20.6%)          | 34 ( 20.9%) |
| Number of Serious Adverse Events                                              | 78                   | 40          |
| <b>INFECTIONS AND INFESTATIONS</b>                                            |                      |             |
| COVID-19                                                                      | 20 ( 6.3%)           | 13 ( 8.0%)  |
| Septic shock                                                                  | 2 ( 0.6%)            | 1 ( 0.6%)   |
| Bronchopulmonary aspergillosis                                                | 1 ( 0.3%)            | 1 ( 0.6%)   |
| COVID-19 pneumonia                                                            | 2 ( 0.6%)            | 0 ( 0.0%)   |
| Pneumonia                                                                     | 0 ( 0.0%)            | 2 ( 1.2%)   |
| Sepsis                                                                        | 2 ( 0.6%)            | 0 ( 0.0%)   |
| Aspergillus infection                                                         | 1 ( 0.3%)            | 0 ( 0.0%)   |

|                                                      |            |           |
|------------------------------------------------------|------------|-----------|
| Bacterial infection                                  | 1 ( 0.3%)  | 0 ( 0.0%) |
| Enterobacter pneumonia                               | 1 ( 0.3%)  | 0 ( 0.0%) |
| Enterococcal sepsis                                  | 1 ( 0.3%)  | 0 ( 0.0%) |
| Pneumonia legionella                                 | 1 ( 0.3%)  | 0 ( 0.0%) |
| Pulmonary sepsis                                     | 0 ( 0.0%)  | 1 ( 0.6%) |
| Urinary tract infection bacterial                    | 0 ( 0.0%)  | 1 ( 0.6%) |
| Viral infection                                      | 1 ( 0.3%)  | 0 ( 0.0%) |
| RESPIRATORY, THORACIC AND MEDIASTINAL DISORDERS      | 12 ( 3.8%) | 8 ( 4.9%) |
| Hypoxia                                              | 3 ( 0.9%)  | 1 ( 0.6%) |
| Respiratory failure                                  | 3 ( 0.9%)  | 1 ( 0.6%) |
| Dyspnoea                                             | 3 ( 0.9%)  | 0 ( 0.0%) |
| Dyspnoea exertional                                  | 2 ( 0.6%)  | 1 ( 0.6%) |
| Acute respiratory distress syndrome                  | 0 ( 0.0%)  | 1 ( 0.6%) |
| Bronchopneumopathy                                   | 0 ( 0.0%)  | 1 ( 0.6%) |
| Dyspnoea at rest                                     | 1 ( 0.3%)  | 0 ( 0.0%) |
| Interstitial lung disease                            | 0 ( 0.0%)  | 1 ( 0.6%) |
| Pulmonary alveolar haemorrhage                       | 0 ( 0.0%)  | 1 ( 0.6%) |
| Pulmonary embolism                                   | 0 ( 0.0%)  | 1 ( 0.6%) |
| Pulmonary oedema                                     | 1 ( 0.3%)  | 0 ( 0.0%) |
| GENERAL DISORDERS AND ADMINISTRATION SITE CONDITIONS | 12 ( 3.8%) | 1 ( 0.6%) |
| Multiple organ dysfunction syndrome                  | 4 ( 1.3%)  | 0 ( 0.0%) |
| Pyrexia                                              | 4 ( 1.3%)  | 0 ( 0.0%) |
| General physical health deterioration                | 3 ( 0.9%)  | 0 ( 0.0%) |
| Death                                                | 0 ( 0.0%)  | 1 ( 0.6%) |
| Disease progression                                  | 1 ( 0.3%)  | 0 ( 0.0%) |

|                                                |           |           |
|------------------------------------------------|-----------|-----------|
| CARDIAC DISORDERS                              | 2 ( 0.6%) | 5 ( 3.1%) |
| Cardiac failure                                | 2 ( 0.6%) | 0 ( 0.0%) |
| Arrhythmia                                     | 0 ( 0.0%) | 1 ( 0.6%) |
| Atrial fibrillation                            | 0 ( 0.0%) | 1 ( 0.6%) |
| Cardiac arrest                                 | 0 ( 0.0%) | 1 ( 0.6%) |
| Cardio-respiratory arrest                      | 0 ( 0.0%) | 1 ( 0.6%) |
| Mitral valve incompetence                      | 0 ( 0.0%) | 1 ( 0.6%) |
| INJURY, POISONING AND PROCEDURAL COMPLICATIONS | 5 ( 1.6%) | 0 ( 0.0%) |
| Transfusion reaction                           | 3 ( 0.9%) | 0 ( 0.0%) |
| Febrile non-hemolytic transfusion reaction     | 1 ( 0.3%) | 0 ( 0.0%) |
| Transfusion related complication               | 1 ( 0.3%) | 0 ( 0.0%) |
| GASTROINTESTINAL DISORDERS                     | 2 ( 0.6%) | 2 ( 1.2%) |
| Abdominal pain                                 | 1 ( 0.3%) | 0 ( 0.0%) |
| Gastrointestinal haemorrhage                   | 1 ( 0.3%) | 0 ( 0.0%) |
| Intestinal obstruction                         | 0 ( 0.0%) | 1 ( 0.6%) |
| Melaena                                        | 0 ( 0.0%) | 1 ( 0.6%) |
| INVESTIGATIONS                                 | 3 ( 0.9%) | 1 ( 0.6%) |
| Oxygen saturation decreased                    | 2 ( 0.6%) | 0 ( 0.0%) |
| Pseudomonas test positive                      | 1 ( 0.3%) | 0 ( 0.0%) |
| SARS-CoV-2 test positive                       | 0 ( 0.0%) | 1 ( 0.6%) |
| NERVOUS SYSTEM DISORDERS                       | 3 ( 0.9%) | 1 ( 0.6%) |
| Ischaemic stroke                               | 1 ( 0.3%) | 1 ( 0.6%) |
| Guillain-Barre syndrome                        | 1 ( 0.3%) | 0 ( 0.0%) |
| Transient ischaemic attack                     | 1 ( 0.3%) | 0 ( 0.0%) |
| RENAL AND URINARY DISORDERS                    | 2 ( 0.6%) | 1 ( 0.6%) |

|                                                                     |           |           |
|---------------------------------------------------------------------|-----------|-----------|
| Acute kidney injury                                                 | 2 ( 0.6%) | 0 ( 0.0%) |
| Urinary retention                                                   | 0 ( 0.0%) | 1 ( 0.6%) |
| BLOOD AND LYMPHATIC SYSTEM DISORDERS                                | 1 ( 0.3%) | 0 ( 0.0%) |
| Anaemia                                                             | 1 ( 0.3%) | 0 ( 0.0%) |
| METABOLISM AND NUTRITION DISORDERS                                  | 0 ( 0.0%) | 1 ( 0.6%) |
| Fluid overload                                                      | 0 ( 0.0%) | 1 ( 0.6%) |
| NEOPLASMS BENIGN, MALIGNANT AND UNSPECIFIED (INCL CYSTS AND POLYPS) | 0 ( 0.0%) | 1 ( 0.6%) |
| Metastatic neoplasm                                                 | 0 ( 0.0%) | 1 ( 0.6%) |
| SURGICAL AND MEDICAL PROCEDURES                                     | 1 ( 0.3%) | 0 ( 0.0%) |
| Lung assist device therapy                                          | 1 ( 0.3%) | 0 ( 0.0%) |
| VASCULAR DISORDERS                                                  | 1 ( 0.3%) | 0 ( 0.0%) |
| Internal haemorrhage                                                | 1 ( 0.3%) | 0 ( 0.0%) |

---
