# Supplementary material for: Early high antibody titre convalescent plasma for hospitalised COVID-19 patients: DAWn-plasma
Source: PubMed Central journal article supplement — Eur Respir J. 2022 Feb 10;59(2):2101724. doi: 10.1183/13993003.01724-2021 (PMC8576805; doi:10.1183/13993003.01724-2021), 2022-02-10
Supplement: ERJ-01724-2021.Supplement_S7.pdf [file ERJ-01724-2021.Supplement_S7.pdf]

Supplement S7: Supplementary Table: Transfusion-Related Side Effects – Full Analysis Set (FAS)

|                                                    |           | Randomised Treatment |
|----------------------------------------------------|-----------|----------------------|
|                                                    | Statistic | PLASMA + SOC         |
| Total Number of Subjects                           | N         | 320                  |
| Any Transfusion Related Side Effects               | n/N (%)   | 19 ( 6.0%)           |
| Acute Lung Injury (TRALI)                          | n/N (%)   | 0 ( 0.0%)            |
| Serious Allergic Transfusion Reaction              | n/N (%)   | 2 ( 0.6%)            |
| Transfusion Associated Circulatory Overload (TACO) | n/N (%)   | 3 ( 0.9%)            |
| Non-Haemolytic Febrile Reaction                    | n/N (%)   | 5 ( 1.6%)            |
| Other Related Side Effect                          | n/N (%)   | 9 ( 2.8%)            |
