# Supplementary material for: Early high antibody titre convalescent plasma for hospitalised COVID-19 patients: DAWn-plasma
Source: PubMed Central journal article supplement — Eur Respir J. 2022 Feb 10;59(2):2101724. doi: 10.1183/13993003.01724-2021 (PMC8576805; doi:10.1183/13993003.01724-2021), 2022-02-10
Supplement: ERJ-01724-2021.Supplement_S8.pdf [file ERJ-01724-2021.Supplement_S8.pdf]

## Supplement S8: Acknowledgments

Members of the Steering Committee of the DAWn-plasma study: Lambrecht Bart, Schots Rik, Toungouz Nevessingsky Michel, van Griensven Johan.

Members of the Steering Committee of the DAWn-studies: Dupont Lieven, Gunst Jan, Rex Steffen, Robberecht Wim, Van Geet Chris, Wauters Joost, Wouters Carine.

Head of department Hematology UZ Leuven and Hemovigilance UZ Leuven: Vandenberghe Peter, Rijks Myrthe, Thalasso Astrid, Costermans Els.

Leuven coordinating center (LCC): Hendrickx Rik, Luyten Ann, Van Rompaey Peter.

COVID-19 Clinical Coordinators UZ Leuven: Adriaenssens Tom, Barbé Astrid, Casaer Michaël, Coppens Steve, Dauwe Dieter, Debaveye Yves, De Coster Johan, Delcroix Marion, Desmet Lars, De Sloovere Veerle, De Troy Erwin, De Vlioger Greet, Dewolf Philippe, Fagard Katleen, Geukens Tatjana, Gielen Evelien, Godinas Laurent, Guedelha Sabino João Pedro, Haghedooren Renata, Henckaerts Liesbeth, Hermans Greet, Ingels Catherine, Jacobs Bart, Lorent Natalie, Meersseman Philippe, Muller Jan, Neyrinck Arne, Peetermans Marijke, Peetermans Willy, Schrijvers An, Van Bleyenbergh Pascal, Vanbrabant Peter, Van den Berghe Greet, Vandembrie Christophe, Van den Eynde Raf, Vandervelden Stefanie, Van de Velde Marc, Vlasselaers Dirk, Wauters Els, Wilmer Alexander.

Research staff DAWn-plasma study sites: De Plus Fem, Ludivine Collard, Morgan Collin, Casneuf An, Samira Azarzar, Melissa Masschelin, Mathijs Bonne, Yasmine Demaeyer, Hélène Tatiana Besse, Muriel Moriau, Laurence Rimsky, Caroline Abbenhuijs, Christine Ors Carot, Necsoi Coca, Anca Reschner, Els Fannes, Vanessa Coubeaux, Anne-Catherine Gerard, Alexa Jonas, Chadya Boudane, Anne Bertrand, Romain Nonis, David Mayne, Marianne Blockmans, Wendy Cartuyvels, Sandrine Vanden Bergh, Robrecht Timmerman, Tine Hendrickx.

Laboratory Medicine UZ Leuven: Lagrou Katrien, Vermeersch Pieter

Rega Institute, Laboratory of Virology and Chemotherapy: Dirk Jochmans, Niels Cremers, Birgit Voeten.

Clinical Trial Center (CTC) UZ Leuven: Boulanger Katrien, De Tollenaere Hilde, Derèze Jean-Jacques, Sterckx Heidi, Zucker Regina.

Clinical Operational Director CTC, on behalf of sponsor: Kathleen Claes.

Belgian Health Care Knowledge Centre (KCE): Hulstaert Frank, Nevens Hilde

All Health Care Workers of all COVID-19 units of all participating hospitals, all convalescent plasma donors, Alphonse Leempoels Fonds, Kiwanis Oud-Heverlee and Soroptimist Leuven.
